# Supplementary material
Source: PubMed Central journal article supplement (PMC3910357)
Supplement: 97320630091013S1.pdf [file 97320630091013S1.pdf]

## Supplementary material:

**Table 1: Selected Monocotyledonous and Dicotyledonous plant with Accession Number**

| S. No. | Plants Name                  | Accession No.  |
|--------|------------------------------|----------------|
| 1.     | Triticum aestivum            | AAG02280.1     |
| 2.     | Triticum aestivum            | AEX59143.1     |
| 3.     | Triticum urartu              | EMS63197.1     |
| 4.     | Brachypodium distachyon      | XP_003575400   |
| 5.     | Zea mays                     | AFW72411.1     |
| 6.     | Aegilops tauschii            | EMT29849.1     |
| 7.     | Hordeum vulgare              | BAJ93084.1     |
| 8.     | Phyllostachys edulis         | ABP96954.2     |
| 9.     | Sorghum bicolor              | XP_002452479.1 |
| 10.    | Pleioblastus maculosoides    | ACM45590.1     |
| 11.    | Phyllostachy parvifolia      | ACM41749.1     |
| 12.    | Bambusa oldhamii             | AAR24505.1     |
| 13.    | Oryza sativa                 | CAA61198.1     |
| 14.    | Lilium                       | BAM28964.1     |
| 15.    | Musa acuminata               | ACG56648.1     |
| 16.    | Arabidopsis thaliana         | AAC18870.1     |
| 17.    | Lactuca sativa               | AAO13347.1     |
| 18.    | Daucus carota                | BAG31930.1     |
| 19.    | Vitis vinifera               | XP_003633985.1 |
| 20.    | Ipomoea                      | AAG49585.1     |
| 21.    | Hibiscus cannabinus          | AFN85669.1     |
| 22.    | Solenostemon scutellarioides | AFZ94859.1     |
| 23.    | Eucalyptus robusta           | BAL49995.1     |
| 24.    | Solanum tuberosum            | AGT63063.1     |

**Table 2: Conserved novel motifs regions analysis of PAL proteins.**

| N | Start | End | Sequence                                                                                                             |
|---|-------|-----|----------------------------------------------------------------------------------------------------------------------|
| 1 | 220   | 244 | -----DLVPLSYIAGL                                                                                                     |
| 2 | 275   | 299 | GFFELQPK EGLAMVNGTAVG SGLAS                                                                                          |
| 3 | 325   | 354 | GKPEFTDHLTHKLKHHPGQIEAAIMEHIL                                                                                        |
| 4 | 370   | 397 | DPLMKPKQDRYALRTSPQWLG PQIEVIR                                                                                        |
| 5 | 399   | 420 | ATKSIEREINSVNDNPLIDVSR                                                                                               |
| 6 | 422   | 530 | KAIHGGNFQGTPIGVSM DNTRLAIAAIGKLMFAQFSELVND FYNNGLPSNLSGGRNP SLDYG<br>FKGAEIAMASYCSELQFLGNPVTNHVQSAEQHNQDVNSLGLISSRKT |
| 7 | 535   | 556 | DILKIMSSTFLVALCQAIDLRH                                                                                               |
